# Supplementary material for: Economic Evaluation of an Internet-Based Preventive Cognitive Therapy With Minimal Therapist Support for Recurrent Depression: Randomized Controlled Trial
Source: PubMed Central journal article supplement (PMC6288594; doi:10.2196/10437), 2018-11-26
Supplement: jmir_v20i11e10437_app4.pdf [file jmir_v20i11e10437_app4.pdf]

Cumulative costs inside and outside the health care sector over 24 months

| Cost types                        | M-CT (n = 99)   |                | TAU (n = 96)    |                |
|-----------------------------------|-----------------|----------------|-----------------|----------------|
|                                   | Mean costs (SD) | % <sup>a</sup> | Mean costs (SD) | % <sup>a</sup> |
| <b>Health care costs</b>          |                 |                |                 |                |
| Mobile CT                         | 73 (19)         | 94             | -               | 0              |
| Psychiatrist                      | 238 (688)       | 23             | 93 (262)        | 19             |
| Psychologist                      | 231 (893)       | 23             | 207 (760)       | 21             |
| Psychotherapist                   | 118 (548)       | 11             | 106 (410)       | 10             |
| Social psychiatric nurse          | 12 (86)         | 3              | 18 (106)        | 5              |
| Social worker                     | 10 (69)         | 3              | 9 (60)          | 3              |
| Self-help groups                  | 3 (22)          | 3              | 18 (114)        | 6              |
| Various MHC <sup>b</sup> services | 590 (1592)      | 30             | 879 (1815)      | 39             |
| Polyclinic care                   | 240 (592)       | 46             | 246 (415)       | 53             |
| CAD <sup>c</sup>                  | -               | 0              | 34 (297)        | 2              |
| General practitioner              | 202 (221)       | 87             | 156 (162)       | 79             |
| Company doctor                    | 87 (233)        | 19             | 45 (157)        | 14             |
| Physiotherapist                   | 378 (770)       | 46             | 285 (576)       | 48             |
| Alternative health care           | 110 (273)       | 28             | 209 (450)       | 35             |
| Antidepressants                   | 52 (144)        | 46             | 68 (154)        | 51             |
| Day care                          | 186 (1719)      | 3              | 168 (1168)      | 4              |
| Hospital admissions               | 361 (1551)      | 10             | 741 (3897)      | 11             |
| <b>Patient and family costs</b>   |                 |                |                 |                |
| Informal care                     | 355 (1070)      | 43             | 272 (915)       | 45             |
| Travel expenses                   | 81 (163)        | 77             | 81 (134)        | 76             |
| (Psychiatric) homecare            | 29 (166)        | 3              | 73 (286)        | 3              |

|                            |             |    |             |    |
|----------------------------|-------------|----|-------------|----|
| Home care                  | 66 (283)    | 10 | 74 (288)    | 13 |
| <b>Productivity losses</b> |             |    |             |    |
| Unpaid work                | 41 (361)    | 5  | 4 (16)      | 7  |
| Absenteeism (paid work)    | 1998 (5438) | 32 | 1542 (5744) | 28 |
| Presenteeism (paid work)   | 424 (1442)  | 38 | 313 (892)   | 34 |

The costs are displayed for participants with at least one cost measurement during follow-up.

<sup>a</sup>Percentage of participants using the cost types concerned

<sup>b</sup>Mental health care services

<sup>c</sup>Consultation office for Alcohol and Drug addiction
